# Supplementary material
Source: publisher site journal article supplement (https://www.dovepress.com/get_supplementary_file.php?f=465917.docx)
Supplement: Supplementary file 1 [file get_supplementary_file.php]

| Table 1 Appendix : Baseline Characteristics Data. | | | | | | | |
| --- | --- | --- | --- | --- | --- | --- | --- |
|  | **A.** | **B.** | **C.** | **D.** | **E.** | **F.** | **G.** |
| **Weight, g *** | 21.17±2.55 | 20.65±2.59 | 21.36±2.40 | 21.90±2.52 | 20.79±2.59 | 21.96±3.71 | **N/A** |
| **Length, mm*** | 95.59±8.11 | 94.98±7.08 | 95.41±7.65 | 96.43±6.91 | 95.02±7.19 | 95.91±6.63 | **N/A** |
| **Food consumption, g/week*** | 17.31±6.38 | 17.43±5.87 | 25.71±6.66 | 19.62±5.94 | 27.64±7.95 | 16.38±5.30 | **N/A** |
| **7up or sugar drink Consumption, ml/week*** | 70.81±21.37 | 74.88±18.70 | **N/A** | 84.74±23.40 | **N/A** | 68.43±16.67 | **N/A** |
| All data are represented as median (interquartile range IQR), except * Mean± SD  A.NOD mice (LD+ / soft drink +). B. NOD mice (LD- / soft drink +). C. NOD mice (LD+ / soft drink -). D. NOD mice (LD- / sugar solution +). E. NOD mice (LD- / soft drink -). F. C57Black mice (LD+ / soft drink +). G. C57Black mice (LD- / soft drink -) | | | | | | | |
